# Supplementary material for: Cation-assisted interactions between N-heterocycles and CO2
Source: Royal Society of Chemistry journal article supplement (doi:10.1039/c5cp01793a), 2015-01-01
Supplement: c5cp01793a1.pdf [file c5cp01793a1.pdf]

## Supporting Information

### Cation-assisted interactions between N-heterocycles and CO<sub>2</sub>

Huarong Tang<sup>[a]</sup>, Dongmei Lu<sup>\*[b]</sup>, and Chao Wu<sup>\*[c]</sup>

[a] School of Materials Science and Engineering & Center for Advancing Materials Performance from the Nanoscale (CAMP-Nano) & State Key Laboratory for Mechanical Behavior of Materials, Xi'an Jiaotong University,

[b] Department of Applied chemistry, School of Science, Xi'an Jiaotong University,

[c] Frontier Institute of Science and Technology, Xi'an Jiaotong University,

Xi'an, Shaanxi 710049, China

**STable 1.** The binding energies (kJ/mol) calculated with the B3LYP, MP2, and M06-2X methods.

| Complex   | B3LYP                   |                      |       | MP2                     |                      |        | M06-2X                  |                      |       |
|-----------|-------------------------|----------------------|-------|-------------------------|----------------------|--------|-------------------------|----------------------|-------|
|           | Without Li <sup>+</sup> | With Li <sup>+</sup> | ΔE    | Without Li <sup>+</sup> | With Li <sup>+</sup> | ΔE     | Without Li <sup>+</sup> | With Li <sup>+</sup> | ΔE    |
| <b>1</b>  | -11.8                   | -25.7                | -13.8 | -13.3                   | -33.9                | -20.6  | -40.8                   | -82.2                | -41.4 |
| <b>10</b> | -106.8                  | -129.4               | -22.6 | -122.2                  | -161.4               | -39.2  | -160.7                  | -189.9               | -29.2 |
| <b>12</b> | -32.9                   | -122.1               | -89.2 | -11.1                   | -118.9               | -107.8 | -82.9                   | -177.4               | -94.5 |

Calculations were carried out using the functionals of B3LYP,<sup>[1]</sup> MP2<sup>[2]</sup> and M06-2X<sup>[3]</sup> with the 6-31++(d,p) basis set, respectively.

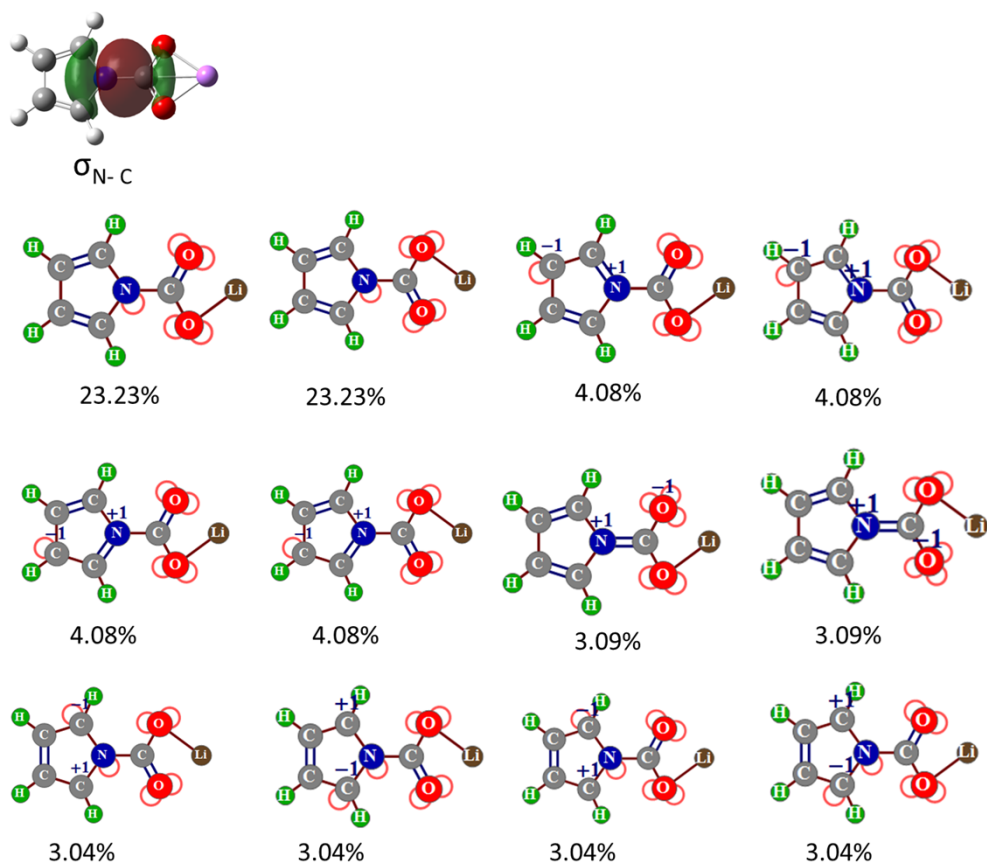

**SFigure 1.** NBO and NRT analyses of pyr-CO<sub>2</sub>-Li<sup>+</sup> complexes (**10**).

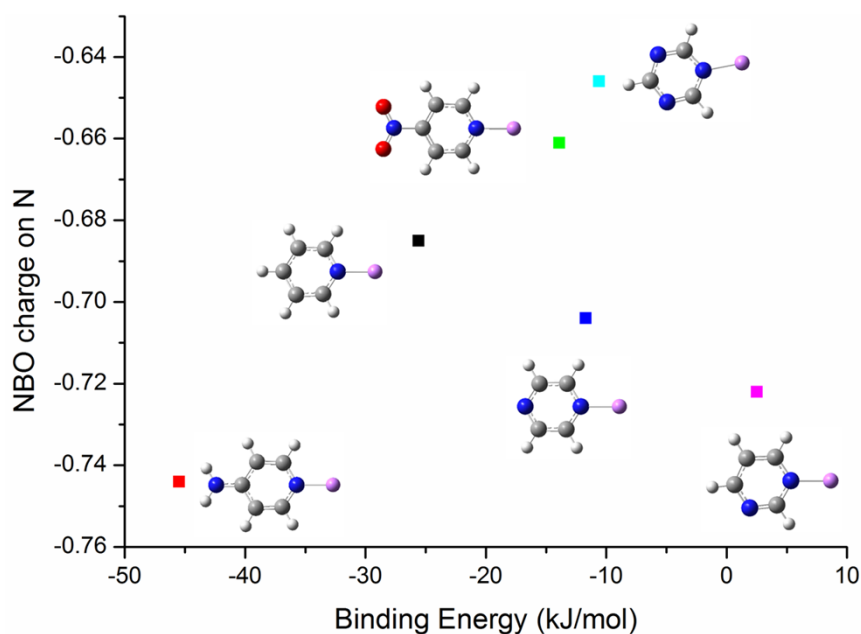

**Figure 2.** Binding energy of neutral six-membered NHCs and CO<sub>2</sub> with Li<sup>+</sup> versus the NBO charge of the reacting N atom.

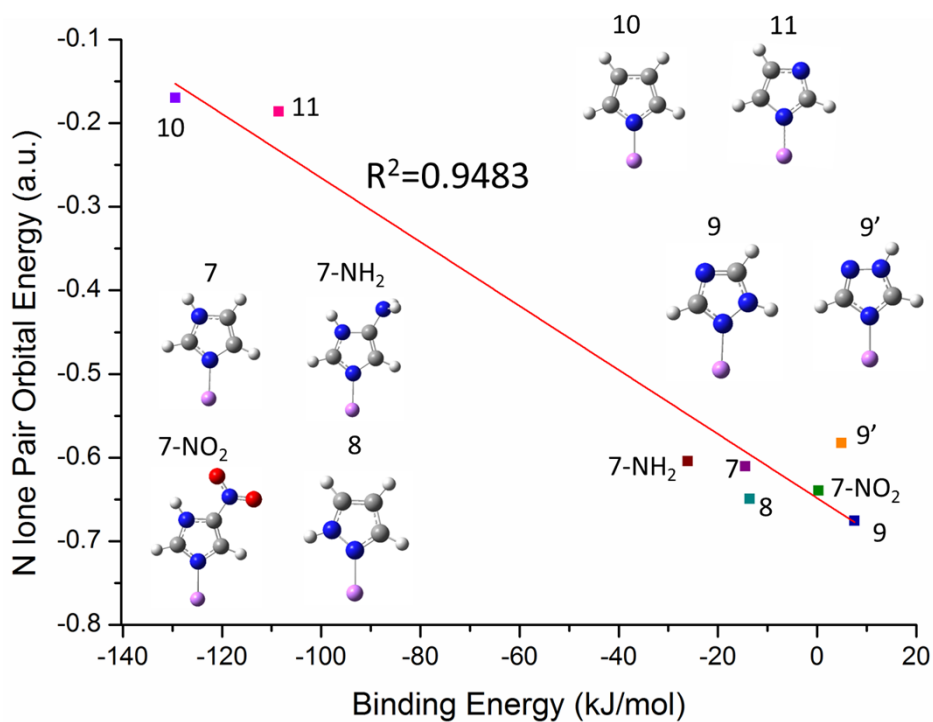

**Figure 3.** Binding energy of five-membered NHCs and CO<sub>2</sub> with Li<sup>+</sup> versus the NBO lone pair energy of the reacting N atom.

## Reference

- [1] a) A. D. Becke, *J. Chem. Phys.* 1993, **98**, 5648-5652; b) C. Lee, W. Yang, R. G. Parr, *Phys. Rev. B* 1988, **37**, 785-789.
- [2] Y. Zhao, D. G. Truhlar, *Theor. Chem. Acc.*, 2008, **120**, 215–241.
- [3] Y. Zhao, D. G. Truhlar, *Acc. Chem. Res.* 2008, **41**, 157-167.
